# Supplementary material for: Healthcare utilization prior to a diagnosis of young-onset Alzheimer’s disease: a nationwide nested case–control study
Source: Springer Nature journal article supplement (doi:10.1007/s00415-023-11974-x), 2023-09-05
Supplement: MOESM1 [file 26008376]

## **Supplementary**

Healthcare utilization prior to a diagnosis of young onset Alzheimer's disease: A nationwide nested case-control study  
*Damsgaard L, Janbek J, Laursen TM, Waldemar G, Jensen-Dahm C. Journal of Neurology*

**Correspondence:** Line Damsgaard, MD

Danish Dementia Research Centre, Section 8008, Department of Neurology, Copenhagen University Hospital - Rigshospitalet, Copenhagen, Denmark

Email: [line.damsgaard@regionh.dk](mailto:line.damsgaard@regionh.dk)

### **Contents:**

**Table S1.** Exclusion criteria

**Table S2.** Contacts rates for primary and secondary care contacts

**Table S3.** Contact rate ratios for primary and secondary care contacts, unadjusted

**Table S4.** Sensitivity analysis – Contact rate ratios by level of cognitive decline at diagnosis in primary care

**Table S5.** Sensitivity analysis – Contact rate ratios by level of cognitive decline at diagnosis in secondary care

**Table S6.** Sensitivity analysis - Contact rate ratios by type of healthcare contact, stratified by age and sex

**Table S1. Exclusion criteria**

|                                                                                                                                                                                                                            | <b>Cases</b> | <b>Controls</b> |
|----------------------------------------------------------------------------------------------------------------------------------------------------------------------------------------------------------------------------|--------------|-----------------|
| <b>Developmental disorders and mental retardation</b><br>ICD-8: 311-315, 759.3, ICD-10: F70-F79, Q90                                                                                                                       | X            | X               |
| <b>Not living in Denmark in 10-year retrospective period</b>                                                                                                                                                               | X            | X               |
| <b>Dementia or mild cognitive impairment diagnosis</b><br>ICD-8: 290.09-11, 290.18-19, 293.09-19, ICD 10: F00.0-00.9, F01.0-01.9, F02.0-F02.8, F03.9, F04.0-F04.9, F06.7 G30.0-G30.9, G31.0A, G31.0B, G31.8, G31.8E, G31.9 | *            | X               |
| <b>Dementia medication</b><br>ATC code N06DA02-4, N06DX01                                                                                                                                                                  |              | X               |
| <b>Entry in DanDem</b>                                                                                                                                                                                                     |              | X               |

\* ICD-codes used for censoring contacts 6 months before dementia diagnosis for cases

Abbreviations: ICD: International classification of diseases, ATC: Anatomical Therapeutic Chemical, DanDem: Danish Dementia Quality Database.

**Table S2. Contact rates for primary and secondary care contacts**

| <b>Primary care</b>                        | <b>Contact rates per person-year</b> |                 | <b>Secondary care</b>                   | <b>Contact rates per person-year</b> |                 |
|--------------------------------------------|--------------------------------------|-----------------|-----------------------------------------|--------------------------------------|-----------------|
| <b>Any GP contact</b>                      | <b>Cases</b>                         | <b>Controls</b> | <b>Somatic inpatient admissions</b>     | <b>Cases</b>                         | <b>Controls</b> |
| 10->5 years prior to index date            | 41.33                                | 37.60           | 10->5 years prior to index date         | 0.68                                 | 0.71            |
| 5->1 years prior to index date             | 38.24                                | 31.83           | 5->1 years prior to index date          | 0.77                                 | 0.70            |
| ≤1 year prior to index date                | 14.42                                | 8.37            | ≤1 year prior to index date             | 0.36                                 | 0.22            |
| <b>GP Face to face contacts</b>            |                                      |                 | <b>Somatic outpatient contacts</b>      |                                      |                 |
| 10->5 years prior to index date            | 22.89                                | 21.33           | 10->5 years prior to index date         | 2.92                                 | 2.67            |
| 5->1 years prior to index date             | 21.35                                | 17.85           | 5->1 years prior to index date          | 2.87                                 | 2.50            |
| ≤1 year prior to index date                | 7.64                                 | 4.65            | ≤1 year prior to index date             | 1.38                                 | 0.71            |
| <b>GP telephone/email contacts</b>         |                                      |                 | <b>Somatic emergency admissions</b>     |                                      |                 |
| 10->5 years prior to index date            | 18.44                                | 16.28           | 10->5 years prior to index date         | 0.64                                 | 0.57            |
| 5->1 years prior to index date             | 16.90                                | 13.98           | 5->1 years prior to index date          | 0.68                                 | 0.51            |
| ≤1 year prior to index date                | 6.79                                 | 3.72            | ≤1 year prior to index date             | 0.27                                 | 0.14            |
| <b>Physiotherapist</b>                     |                                      |                 | <b>Psychiatric inpatient admissions</b> |                                      |                 |
| 10->5 years prior to index date            | 9.50                                 | 8.10            | 10->5 years prior to index date         | 0.03                                 | 0.03            |
| 5->1 years prior to index date             | 7.05                                 | 7.89            | 5->1 years prior to index date          | 0.05                                 | 0.04            |
| ≤1 year prior to index date                | 1.40                                 | 2.11            | ≤1 year prior to index date             | 0.04                                 | 0.01            |
| <b>Psychologist</b>                        |                                      |                 | <b>Psychiatric emergency admissions</b> |                                      |                 |
| 10->5 years prior to index date            | 0.36                                 | 0.36            | 10->5 years prior to index date         | 0.04                                 | 0.04            |
| 5->1 years prior to index date             | 0.57                                 | 0.24            | 5->1 years prior to index date          | 0.05                                 | 0.04            |
| ≤1 year prior to index date                | 0.24                                 | 0.06            | ≤1 year prior to index date             | 0.06                                 | 0.01            |
| <b>Private practice medical specialist</b> |                                      |                 |                                         |                                      |                 |
| 10->5 years prior to index date            | 5.57                                 | 4.99            |                                         |                                      |                 |
| 5->1 years prior to index date             | 4.72                                 | 4.43            |                                         |                                      |                 |
| ≤1 year prior to index date                | 1.26                                 | 1.18            |                                         |                                      |                 |

Contact rates are presented in time intervals prior to index date (date of diagnosis for cases) for cases and controls separately by type of contact.  
Abbreviations: GP: general practitioner

**Table S3. Contact rate ratios for primary and secondary care contacts, unadjusted**

| <b>Primary care</b>                        | <b>Unadjusted</b> |                |                | <b>Secondary care</b>                   | <b>Unadjusted</b> |                |                |
|--------------------------------------------|-------------------|----------------|----------------|-----------------------------------------|-------------------|----------------|----------------|
| <b>Any GP contact</b>                      | <b>CRR</b>        | <b>95 % CI</b> | <b>P-value</b> | <b>Somatic inpatient admissions</b>     | <b>CRR</b>        | <b>95 % CI</b> | <b>P-value</b> |
| 10->5 years prior to index date            | 1.10              | 1.03-1.17      | 0.003          | 10->5 years prior to index date         | 0.96              | 0.83-1.10      | 0.540          |
| 5->1 years prior to index date             | 1.20              | 1.13-1.28      | ≤.00001        | 5->1 years prior to index date          | 1.10              | 0.93-1.29      | 0.268          |
| ≤1 year prior to index date                | 1.72              | 1.62-1.83      | ≤.00001        | ≤1 year prior to index date             | 1.63              | 1.33-2.01      | ≤.00001        |
| <b>GP Face to face contacts</b>            |                   |                |                | <b>Somatic outpatient contacts</b>      |                   |                |                |
| 10->5 years prior to index date            | 1.07              | 1.01-1.14      | 0.023          | 10->5 years prior to index date         | 1.09              | 1.02-1.17      | 0,011          |
| 5->1 years prior to index date             | 1.20              | 1.13-1.27      | ≤.00001        | 5->1 years prior to index date          | 1.15              | 1.07-1.23      | ≤.00001        |
| ≤1 year prior to index date                | 1.64              | 1.55-1.74      | ≤.00001        | ≤1 year prior to index date             | 1.92              | 1.78-2.08      | ≤.00001        |
| <b>GP telephone/email contacts</b>         |                   |                |                | <b>Somatic emergency admissions</b>     |                   |                |                |
| 10->5 years prior to index date            | 1.13              | 1.04-1.24      | 0.005          | 10->5 years prior to index date         | 1.12              | 0.99-1.27      | 0.071          |
| 5->1 years prior to index date             | 1.21              | 1.11-1.32      | ≤.00001        | 5->1 years prior to index date          | 1.33              | 1.17-1.52      | ≤.00001        |
| ≤1 year prior to index date                | 1.82              | 1.67-1.99      | ≤.00001        | ≤1 year prior to index date             | 1.90              | 1.56-2.33      | ≤.00001        |
| <b>Physiotherapist</b>                     |                   |                |                | <b>Psychiatric inpatient admissions</b> |                   |                |                |
| 10->5 years prior to index date            | 1.17              | 0.45-0.97      | 0.310          | 10->5 years prior to index date         | 0.76              | 0.38-1.50      | 0.424          |
| 5->1 years prior to index date             | 0.89              | 0.66-1.21      | 0.465          | 5->1 years prior to index date          | 1.45              | 0.57-3.65      | 0.433          |
| ≤1 year prior to index date                | 0.67              | 0.86-1.60      | 0.035          | ≤1 year prior to index date             | 6.50              | 2.16-19.60     | 0.001          |
| <b>Psychologist</b>                        |                   |                |                | <b>Psychiatric emergency admissions</b> |                   |                |                |
| 10->5 years prior to index date            | 0.98              | 0.65-1.46      | 0.917          | 10->5 years prior to index date         | 1.01              | 0.52-1.96      | 0.980          |
| 5->1 years prior to index date             | 2.33              | 1.56-3.49      | ≤.00001        | 5->1 years prior to index date          | 1.23              | 0.53-2.81      | 0.631          |
| ≤1 year prior to index date                | 4.32              | 2.47-7.57      | ≤.00001        | ≤1 year prior to index date             | 6.77              | 3.05-15.04     | ≤.00001        |
| <b>Private practice medical specialist</b> |                   |                |                |                                         |                   |                |                |
| 10->5 years prior to index date            | 1.12              | 0.97-1.28      | 0.119          |                                         |                   |                |                |
| 5->1 years prior to index date             | 1.07              | 0.94-1.21      | 0.312          |                                         |                   |                |                |
| ≤1 year prior to index date                | 1.07              | 0.91-1.25      | 0.424          |                                         |                   |                |                |

CRRs are presented in time intervals prior to the date of dementia diagnosis for cases and compared to the control group of individuals free of dementia at index date. Abbreviations: GP: general practitioner, CRR: contact rate ratio, CI: confidence interval.

**Table S4. Sensitivity analysis – Contact rate ratios by level of cognitive decline at diagnosis in primary care**

| Primary care                               | MCI / Mild dementia |           |         |          |            |         | Moderate / severe dementia |            |         |          |           |         |
|--------------------------------------------|---------------------|-----------|---------|----------|------------|---------|----------------------------|------------|---------|----------|-----------|---------|
|                                            | Unadjusted          |           |         | Adjusted |            |         | Unadjusted                 |            |         | Adjusted |           |         |
|                                            | CRR                 | 95 % CI   | P-value | CRR      | 95 % CI    | P-value | CRR                        | 95 % CI    | P-value | CRR      | 95 % CI   | P-value |
| <b>Any GP contact</b>                      |                     |           |         |          |            |         |                            |            |         |          |           |         |
| 10->5 years prior to index date            | 1.01                | 0.94-1.09 | 0.801   | 1.03     | 0.95-1.11  | 0.484   | 1.23                       | 1.11-1.36  | ≤.00001 | 1.20     | 1.09-1.32 | ≤.00001 |
| 5->1 years prior to index date             | 1.14                | 1.06-1.23 | 0.001   | 1.16     | 1.08-1.25  | ≤.00001 | 1.29                       | 1.17-1.43  | ≤.00001 | 1.26     | 1.14-1.39 | ≤.00001 |
| ≤1 year prior to index date                | 1.60                | 1.49-1.72 | ≤.00001 | 1.65     | 1.54-1.76  | ≤.00001 | 1.91                       | 1.73-2.12  | ≤.00001 | 1.87     | 1.70-2.07 | ≤.00001 |
| <b>GP Face to face contacts</b>            |                     |           |         |          |            |         |                            |            |         |          |           |         |
| 10->5 years prior to index date            | 1.01                | 0.94-1.10 | 0.728   | 1.03     | 0.95-1.12  | 0.417   | 1.16                       | 1.06-1.28  | 0.002   | 1.14     | 1.04-1.26 | 0.007   |
| 5->1 years prior to index date             | 1.18                | 1.09-1.27 | ≤.00001 | 1.21     | 1.12-1.30  | ≤.00001 | 1.22                       | 1.11-1.35  | ≤.00001 | 1.21     | 1.10-1.33 | ≤.00001 |
| ≤1 year prior to index date                | 1.65                | 1.54-1.77 | ≤.00001 | 1.70     | 1.59-1.82  | ≤.00001 | 1.63                       | 1.48-1.80  | ≤.00001 | 1.62     | 1.47-1.79 | ≤.00001 |
| <b>GP telephone/email contacts</b>         |                     |           |         |          |            |         |                            |            |         |          |           |         |
| 10->5 years prior to index date            | 1.00                | 0.91-1.11 | 0.928   | 1.02     | 0.93-1.13  | 0.670   | 1.32                       | 1.14-1.52  | ≤.00001 | 1.29     | 1.12-1.48 | ≤.00001 |
| 5->1 years prior to index date             | 1.09                | 0.98-1.22 | 0.106   | 1.11     | 1.00-1.23  | 0.046   | 1.38                       | 1.20-1.59  | ≤.00001 | 1.32     | 1.15-1.52 | ≤.00001 |
| ≤1 year prior to index date                | 1.54                | 1.38-1.71 | ≤.00001 | 1.57     | 1.42-1.75  | ≤.00001 | 2.26                       | 1.97-2.60  | ≤.00001 | 2.19     | 1.91-2.50 | ≤.00001 |
| <b>Physiotherapist</b>                     |                     |           |         |          |            |         |                            |            |         |          |           |         |
| 10->5 years prior to index date            | 1.11                | 0.77-1.61 | 0.563   | 1.03     | 0.72-1.47  | 0.871   | 1.24                       | 0.75-2.05  | 0.398   | 1.20     | 0.76-1.89 | 0.428   |
| 5->1 years prior to index date             | 0.92                | 0.64-1.33 | 0.669   | 0.85     | 0.60-1.19  | 0.345   | 0.85                       | 0.51-1.44  | 0.552   | 0.81     | 0.50-1.32 | 0.394   |
| ≤1 year prior to index date                | 0.66                | 0.40-1.07 | 0.093   | 0.59     | 0.38-0.92  | 0.021   | 0.68                       | 0.37-1.24  | 0.205   | 0.60     | 0.34-1.05 | 0.074   |
| <b>Psychologist</b>                        |                     |           |         |          |            |         |                            |            |         |          |           |         |
| 10->5 years prior to index date            | 1.15                | 0.68-1.95 | 0.608   | 1.43     | 0.78-2.61  | 0.250   | 0.77                       | 0.41-1.44  | 0.411   | 1.75     | 0.75-4.09 | 0.198   |
| 5->1 years prior to index date             | 2.55                | 1.51-4.29 | ≤.00001 | 2.65     | 1.31-5.33  | 0.007   | 1.99                       | 1.08-3.69  | 0.028   | 3.59     | 1.77-7.31 | ≤.00001 |
| ≤1 year prior to index date                | 4.49                | 2.31-8.73 | ≤.00001 | 5.17     | 2.32-11.50 | ≤.00001 | 3.82                       | 1.37-10.65 | ≤.00001 | 3.31     | 1.16-9.47 | 0.025   |
| <b>Private practice medical specialist</b> |                     |           |         |          |            |         |                            |            |         |          |           |         |
| 10->5 years prior to index date            | 1.23                | 1.02-1.49 | 0.024   | 1.25     | 1.02-1.54  | 0.036   | 0.97                       | 0.81-1.17  | 0.746   | 0.99     | 0.82-1.19 | 0.909   |
| 5->1 years prior to index date             | 1.25                | 1.07-1.47 | 0.005   | 1.25     | 1.06-1.48  | 0.007   | 0.84                       | 0.69-1.02  | 0.073   | 0.84     | 0.69-1.02 | 0.084   |
| ≤1 year prior to index date                | 1.28                | 1.03-1.59 | 0.024   | 1.31     | 1.04-1.64  | 0.020   | 0.79                       | 0.63-0.99  | 0.048   | 0.80     | 0.63-1.01 | 0.058   |

CRRs are presented in time intervals prior to the date of dementia diagnosis for cases and compared to the control group of individuals free of dementia at index date. Abbreviations: MCI: Mild cognitive impairment, CRR: contact rate ratio, CI: confidence interval, GP: general practitioner

**Table S5. Sensitivity analysis – Contact rate ratios by level of cognitive decline at diagnosis in secondary care**

| Secondary care                          | MCI / Mild dementia |            |         |          |            |         | Moderate / severe dementia |            |         |          |            |         |
|-----------------------------------------|---------------------|------------|---------|----------|------------|---------|----------------------------|------------|---------|----------|------------|---------|
|                                         | Unadjusted          |            |         | Adjusted |            |         | Unadjusted                 |            |         | Adjusted |            |         |
|                                         | CRR                 | 95 % CI    | P-value | CRR      | 95 % CI    | P-value | CRR                        | 95 % CI    | P-value | CRR      | 95 % CI    | P-value |
| <b>Somatic inpatient admissions</b>     |                     |            |         |          |            |         |                            |            |         |          |            |         |
| 10->5 years prior to index date         | 0.93                | 0.77-1.13  | 0.477   | 0.97     | 0.81-1.18  | 0.791   | 0.99                       | 0.80-1.23  | 0.911   | 0.98     | 0.78-1.22  | 0.842   |
| 5->1 years prior to index date          | 0.95                | 0.78-1.15  | 0.577   | 0.99     | 0.82-1.20  | 0.900   | 1.33                       | 1.01-1.75  | 0.043   | 1.28     | 0.97-1.70  | 0.079   |
| ≤1 year prior to index date             | 1.25                | 0.96-1.63  | 0.101   | 1.34     | 1.03-1.75  | 0.028   | 2.26                       | 1.64-3.10  | ≤.00001 | 2.17     | 1.58-2.97  | ≤.00001 |
| <b>Somatic outpatient contacts</b>      |                     |            |         |          |            |         |                            |            |         |          |            |         |
| 10->5 years prior to index date         | 1.13                | 1.03-1.23  | 0.010   | 1.11     | 1.01-1.22  | 0.037   | 1.05                       | 0.94-1.16  | 0.396   | 1.05     | 0.94-1.17  | 0.374   |
| 5->1 years prior to index date          | 1.19                | 1.09-1.30  | ≤.00001 | 1.20     | 1.09-1.31  | ≤.00001 | 1.10                       | 0.98-1.23  | 0.118   | 1.13     | 0.99-1.28  | 0.061   |
| ≤1 year prior to index date             | 2.14                | 1.94-2.36  | ≤.00001 | 2.25     | 2.02-2.50  | ≤.00001 | 1.65                       | 1.45-1.89  | ≤.00001 | 1.71     | 1.49-1.96  | ≤.00001 |
| <b>Somatic emergency admissions</b>     |                     |            |         |          |            |         |                            |            |         |          |            |         |
| 10->5 years prior to index date         | 0.98                | 0.84-1.14  | 0.775   | 1.03     | 0.88-1.21  | 0.703   | 1.35                       | 1.11-1.64  | 0.002   | 1.31     | 1.09-1.59  | 0.005   |
| 5->1 years prior to index date          | 1.21                | 1.03-1.42  | 0.019   | 1.26     | 1.08-1.48  | 0.004   | 1.54                       | 1.25-1.90  | ≤.00001 | 1.49     | 1.21-1.84  | ≤.00001 |
| ≤1 year prior to index date             | 1.36                | 1.03-1.80  | 0.031   | 1.41     | 1.07-1.86  | 0.014   | 2.82                       | 2.13-3.75  | ≤.00001 | 2.69     | 2.03-3.55  | ≤.00001 |
| <b>Psychiatric inpatient admissions</b> |                     |            |         |          |            |         |                            |            |         |          |            |         |
| 10->5 years prior to index date         | 0.34                | 0.12-0.96  | 0.042   | 0.30     | 0.09-0.99  | 0.048   | 2.55                       | 1.10-5.89  | 0.029   | 2.01     | 0.93-4.36  | 0.076   |
| 5->1 years prior to index date          | 0.64                | 0.21-1.94  | 0.429   | 1.96     | 0.86-4.50  | 0.111   | 5.25                       | 1.63-16.91 | ≤.00001 | 3.60     | 1.26-10.28 | 0.016   |
| ≤1 year prior to index date             | 2.79                | 0.75-10.30 | 0.125   | 6.36     | 2.60-15.59 | ≤.00001 | 19.5                       | 4.72-80.59 | ≤.00001 | 14.70    | 3.70-58.46 | ≤.00001 |
| <b>Psychiatric emergency admissions</b> |                     |            |         |          |            |         |                            |            |         |          |            |         |
| 10->5 years prior to index date         | 0.44                | 0.15-1.28  | 0.134   | 0.31     | 0.11-0.85  | 0.024   | 3.25                       | 1.49-7.08  | 0.003   | 2.45     | 1.20-5.01  | 0.014   |
| 5->1 years prior to index date          | 0.52                | 0.15-1.80  | 0.302   | 1.70     | 0.66-4.34  | 0.270   | 3.66                       | 1.35-9.89  | 0.011   | 3.02     | 1.20-7.58  | 0.019   |
| ≤1 year prior to index date             | 2.86                | 0.91-9.04  | 0.073   | 4.55     | 1.68-12.27 | 0.003   | 24.00                      | 7.06-73.30 | ≤.00001 | 23.76    | 7.59-74.38 | ≤.00001 |

CRRs are presented in time intervals prior to the date of dementia diagnosis for cases and compared to the control group of individuals free of dementia at index date. Abbreviations: MCI: Mild cognitive impairment, CRR: contact rate ratio, CI: confidence interval.

**Table S6. Sensitivity analysis - Contact rate ratios by type of healthcare contact, stratified by age and sex**

| Consultation rate ratios (CRR)          | Age at index <60 years* |            |         | Age at index ≥60* |            |         | Male** |            |         | Female** |            |         |
|-----------------------------------------|-------------------------|------------|---------|-------------------|------------|---------|--------|------------|---------|----------|------------|---------|
|                                         | CRR                     | 95 % CI    | P-value | CRR               | 95 % CI    | P-value | CRR    | 95 % CI    | P-value | CRR      | 95 % CI    | P-value |
| <b>Any GP contact</b>                   |                         |            |         |                   |            |         |        |            |         |          |            |         |
| 10->5 years prior to index date         | 1.12                    | 0.97-1.28  | 0.119   | 1.09              | 1.02-1.17  | 0.011   | 1.07   | 0.97-1.19  | 0.176   | 1.11     | 1.03-1.20  | 0.005   |
| 5->1 years prior to index date          | 1.26                    | 1.11-1.42  | ≤.00001 | 1.19              | 1.11-1.27  | ≤.00001 | 1.16   | 1.05-1.27  | 0.003   | 1.23     | 1.14-1.33  | ≤.00001 |
| ≤1 year prior to index date             | 1.98                    | 1.74-2.24  | ≤.00001 | 1.68              | 1.57-1.79  | ≤.00001 | 1.82   | 1.67-2.00  | ≤.00001 | 1.67     | 1.56-1.80  | ≤.00001 |
| <b>Somatic inpatient admissions</b>     |                         |            |         |                   |            |         |        |            |         |          |            |         |
| 10->5 years prior to index date         | 0.92                    | 0.68-1.25  | 0.604   | 0.99              | 0.84-1.16  | 0.865   | 0.82   | 0.66-1.03  | 0.083   | 1.10     | 0.91-1.33  | 0.305   |
| 5->1 years prior to index date          | 1.21                    | 0.87-1.67  | 0.254   | 1.08              | 0.90-1.30  | 0.411   | 1.01   | 0.80-1.27  | 0.918   | 1.18     | 0.94-1.48  | 0.164   |
| ≤1 year prior to index date             | 2.20                    | 1.50-3.25  | ≤.00001 | 1.55              | 1.23-1.95  | ≤.00001 | 1.66   | 1.24-2.24  | 0.001   | 1.66     | 1.27-2.18  | ≤.00001 |
| <b>Somatic outpatient contacts</b>      |                         |            |         |                   |            |         |        |            |         |          |            |         |
| 10->5 years prior to index date         | 1.10                    | 0.90-1.34  | 0.336   | 1.08              | 1.81-2.16  | 0.045   | 1.06   | 0.90-1.24  | 0.487   | 1.10     | 1.02-1.19  | 0.013   |
| 5->1 years prior to index date          | 1.19                    | 1.02-1.39  | 0.030   | 1.17              | 1.07-1.27  | ≤.00001 | 1.33   | 1.14-1.54  | ≤.00001 | 1.10     | 1.02-1.19  | 0.013   |
| ≤1 year prior to index date             | 2.17                    | 1.72-2.74  | ≤.00001 | 1.98              | 1.00-1.67  | ≤.00001 | 2.94   | 2.51-3.44  | ≤.00001 | 1.62     | 1.48-1.78  | ≤.00001 |
| <b>Somatic emergency admissions</b>     |                         |            |         |                   |            |         |        |            |         |          |            |         |
| 10->5 years prior to index date         | 1.00                    | 0.78-1.28  | 0.996   | 1.16              | 1.01-1.33  | 0.030   | 1.13   | 0.94-1.35  | 0.201   | 1.13     | 0.96-1.33  | 0.136   |
| 5->1 years prior to index date          | 1.34                    | 1.02-1.76  | 0.038   | 1.34              | 1.16-1.54  | ≤.00001 | 1.23   | 1.02-1.49  | 0.032   | 1.42     | 2.30-1.68  | ≤.00001 |
| ≤1 year prior to index date             | 1.82                    | 1.17-2.82  | 0.008   | 1.90              | 1.53-2.36  | ≤.00001 | 2.10   | 1.56-2.83  | ≤.00001 | 1.74     | 1.34-2.26  | ≤.00001 |
| <b>Psychiatric inpatient admissions</b> |                         |            |         |                   |            |         |        |            |         |          |            |         |
| 10->5 years prior to index date         | 0.37                    | 0.90-1.49  | 0.161   | 0.75              | 0.35-1.61  | 0.463   | 0.89   | 0.40-1.99  | 0.781   | 0.71     | 0.25-2.01  | 0.514   |
| 5->1 years prior to index date          | 2.08                    | 0.34-12.70 | 0.426   | 2.08              | 1.36-5.74  | 0.005   | 1.53   | 0.53-4.42  | 0.428   | 3.64     | 1.76-7.52  | ≤.00001 |
| ≤1 year prior to index date             | 12.36                   | 3.46-44.17 | ≤.00001 | 8.93              | 3.47-22.97 | ≤.00001 | 12.14  | 4.64-31.70 | ≤.00001 | 8.67     | 2.99-25.10 | ≤.00001 |
| <b>Psychiatric emergency admissions</b> |                         |            |         |                   |            |         |        |            |         |          |            |         |
| 10->5 years prior to index date         | 0.55                    | 0.08-3.57  | 0.526   | 1.02              | 0.50-2.07  | 0.959   | 1.24   | 0.52-2.96  | 0.633   | 0.77     | 0.30-1.98  | 0.585   |
| 5->1 years prior to index date          | 1.56                    | 0.37-6.51  | 0.541   | 2.23              | 1.02-4.89  | 0.044   | 0.67   | 0.24-1.87  | 0.447   | 3.54     | 1.62-7.78  | 0.002   |
| ≤1 year prior to index date             | 9.91                    | 1.58-62.11 | 0.014   | 12.12             | 5.96-24.67 | ≤.00001 | 12.64  | 4.97-32.13 | ≤.00001 | 10.03    | 4.53-22.17 | ≤.00001 |

\* Adjusted for age, sex (except \*\*), highest attained educational level at age 40 (or at time of diagnosis, whichever came first) and civil status at index date. CRRs are presented in time intervals prior to the date of dementia diagnosis for cases and compared to the control group of individuals free of dementia at index date.

Sensitivity analysis presented for a selection of types of contacts. Remaining types of contacts are equally similar to the results found in the main analysis.

Abbreviations: CRR: contact rate ratio, CI: confidence interval. GP: general practitioner
